# Supplementary material for: A combination of plasma phospholipid fatty acids and its association with incidence of type 2 diabetes: The EPIC-InterAct case-cohort study
Source: PubMed Central journal article supplement (PMC5636062; doi:10.1371/journal.pmed.1002409), 2017-10-11
Supplement: pmed.1002409.s006.pdf [file pmed.1002409.s006.pdf]

**S1 Table.** Baseline characteristics according to quintile categories of the fatty acid pattern score in the sub-cohort of EPIC-InterAct (n=15,919).\*

|                                    | Quintile categories of the fatty acid pattern score* |             |             |             |             |   |
|------------------------------------|------------------------------------------------------|-------------|-------------|-------------|-------------|---|
|                                    | I                                                    | II          | III         | IV          | V           |   |
| Age, years                         | 53 (9)                                               | 52 (9)      | 52 (9)      | 52 (9)      | 53 (9)      |   |
| Sex, % men                         | 47                                                   | 39          | 37          | 34          | 30          | † |
| Education, ≥high school, %         | 36                                                   | 36          | 38          | 36          | 34          |   |
| Current smokers, %                 | 32                                                   | 26          | 25          | 24          | 22          | † |
| High physical activity, %          | 44                                                   | 44          | 42          | 42          | 41          |   |
| Postmenopausal, % in women         | 28                                                   | 29          | 30          | 33          | 38          |   |
| Hormone therapy, % in women        | 21                                                   | 15          | 13          | 13          | 12          | † |
| Family history of diabetes, % ‡    | 20                                                   | 21          | 19          | 18          | 18          |   |
| Prevalent diseases                 |                                                      |             |             |             |             |   |
| Hypertension, %                    | 24                                                   | 21          | 17          | 17          | 14          | † |
| Dyslipidaemia, %                   | 26                                                   | 19          | 17          | 15          | 14          | † |
| Coronary heart disease, %          | 2.5                                                  | 2.1         | 2.8         | 2.1         | 2.1         |   |
| Dietary consumption                |                                                      |             |             |             |             |   |
| Energy, mega joules/day            | 9.3 (2.8)                                            | 9 (2.7)     | 8.9 (2.6)   | 8.8 (2.6)   | 8.8 (2.5)   | † |
| Alcohol, g/day                     | 20 (19)                                              | 12 (14)     | 9 (11)      | 7 (10)      | 6 (9)       | † |
| Fibre, g/day                       | 21 (6)                                               | 22 (6)      | 22 (6)      | 23 (6)      | 23 (6)      | † |
| Vegetables, g/day                  | 160 (101)                                            | 171 (109)   | 179 (113)   | 191 (125)   | 208 (128)   | † |
| Fruits, g/day                      | 216 (181)                                            | 229 (177)   | 238 (183)   | 237 (183)   | 243 (183)   | † |
| Soft drinks, g/day                 | 78 (184)                                             | 69 (149)    | 67 (150)    | 68 (145)    | 62 (138)    | † |
| Processed meat, g/day              | 35 (28)                                              | 34 (27)     | 33 (26)     | 33 (25)     | 31 (24)     | † |
| Body mass index, kg/m <sup>2</sup> | 26.7 (4.4)                                           | 26.2 (4.3)  | 26.0 (4.2)  | 25.6 (4.1)  | 25.5 (4.0)  | † |
| Haemoglobin A1c, mmol/mol          | 36.2 (5.9)                                           | 36.2 (5.1)  | 36.2 (4.7)  | 36.2 (4.2)  | 36.3 (4.2)  |   |
| Triglycerides, mmol/L              | 1.8 (1.2)                                            | 1.4 (0.9)   | 1.3 (0.7)   | 1.2 (0.7)   | 1.1 (0.6)   | † |
| High-density lipoprotein, mmol/L   | 1.47 (0.45)                                          | 1.49 (0.42) | 1.48 (0.41) | 1.51 (0.41) | 1.53 (0.41) | † |
| C-reactive protein, µmol/L         | 2.6 (4.0)                                            | 2.3 (4.0)   | 2.1 (3.9)   | 1.9 (3.6)   | 2.0 (3.9)   | † |
| Gamma glutamyltransferase, U/L     | 30 (37)                                              | 44 (60)     | 29 (30)     | 27 (30)     | 24 (25)     | † |
| Genetic risk score, z-score        |                                                      |             |             |             |             |   |
| Insulin resistance                 | 0.03 (1.0)                                           | -0.00 (1.0) | 0.01 (1.0)  | -0.02 (1.0) | -0.02 (1.0) |   |
| Body-mass index                    | -0.02 (1.0)                                          | 0.01 (1.0)  | 0.01 (1.0)  | -0.01 (1.0) | 0.01 (1.0)  |   |
| Fatty acid classes, % total §      |                                                      |             |             |             |             |   |
| Saturated FA (14:0+16:0+18:0)      | 46.3 (1)                                             | 46.1 (1.1)  | 45.9 (1.2)  | 45.8 (1.2)  | 45.8 (1.4)  | † |
| Monounsaturated FA (16:1+18:1)     | 12.5 (2)                                             | 11.4 (1.6)  | 10.9 (1.6)  | 10.5 (1.5)  | 9.8 (1.7)   | † |
| Omega-3 PUFA (EPA+DPA+DHA)         | 5.9 (1.6)                                            | 6.2 (1.8)   | 6.5 (1.9)   | 6.7 (2.0)   | 6.9 (2.2)   | † |
| Trans FA (trans-18:1+trans-18:2)   | 0.2 (0.1)                                            | 0.3 (0.2)   | 0.3 (0.2)   | 0.4 (0.2)   | 0.4 (0.2)   | † |
| Odd-chain saturated FA (15:0+17:0) | 0.5 (0.1)                                            | 0.6 (0.1)   | 0.6 (0.1)   | 0.7 (0.1)   | 0.7 (0.1)   | † |

\* EPIC-InterAct, European Prospective Investigation into Cancer and Nutrition-InterAct (EPIC-InterAct), using the fatty acid pattern score generated by applying principal component analysis to 27 individual fatty acids of circulating phospholipids. Values represent means (standard deviations) for continuous variables and percentages for categorical variables.

† *p* for trend < 0.01 across quintile categories.

‡ not available in two research centres, thus evaluated among 11,111 adults.

§ % of total phospholipid fatty acids is presented. Each of 27 fatty acids is shown in Table 1.

Abbreviations: FA, fatty acids; PUFA, polyunsaturated fatty acids; EPA, eicosapentaenoic acid; DPA, docosapentaenoic acid; and DHA, docosahexaenoic acid.
