# Supplementary material for: A combination of plasma phospholipid fatty acids and its association with incidence of type 2 diabetes: The EPIC-InterAct case-cohort study
Source: PubMed Central journal article supplement (PMC5636062; doi:10.1371/journal.pmed.1002409), 2017-10-11
Supplement: pmed.1002409.s007.pdf [file pmed.1002409.s007.pdf]

**S2 Table.** Baseline characteristics according to presence or absence of missing information among participants with fatty acid measures: EPIC-InterAct (n=27,296).

|                                                                                  | % missing | No missing<br>n=23,039 | 1 ≥ missing*<br>n=4,257 | p-value |
|----------------------------------------------------------------------------------|-----------|------------------------|-------------------------|---------|
| Age, years                                                                       | 0         | 53.6 (8.7)             | 54.3 (8.9)              | 0.006   |
| Sex, % men                                                                       | 0         | 43                     | 43                      | 0.68    |
| Education, ≥high school, %                                                       | 2.1       | 32                     | 30                      | <0.001  |
| Smoking status, %                                                                | 1.2       |                        |                         |         |
| Former smokers                                                                   |           | 29                     | 30                      |         |
| Current smokers                                                                  |           | 26                     | 28                      | 0.004   |
| High physical activity, %                                                        | 1.4       | 40                     | 41                      | 0.001   |
| Postmenopausal, % in women                                                       | 0         | 57                     | 57                      | 0.77    |
| Hormone use, % in women                                                          | 4.4       | 14                     | 15                      | 0.13    |
| Family history of diabetes, % †                                                  | 49.9      | 27                     | 27                      | <0.001  |
| Prevalent diseases                                                               |           |                        |                         |         |
| Hypertension, %                                                                  | 2.7       | 27                     | 28                      | 0.95    |
| Dyslipidaemia, %                                                                 | 4.2       | 26                     | 24                      | 0.01    |
| Coronary heart disease, % ‡                                                      | 0         | 3.6                    | 3.5                     | 0.08    |
| Dietary consumption                                                              |           |                        |                         |         |
| Energy, mega joules                                                              | 2.6       | 9.0 (2.7)              | 8.9 (2.8)               | 0.67    |
| Alcohol, g                                                                       | 0.4       | 12 (15)                | 8.8 (13)                | <0.001  |
| Fibre, g                                                                         | 2.6       | 21.9 (5.9)             | 21.7 (6.1)              | 0.02    |
| Vegetables, g                                                                    | 2.6       | 181 (118)              | 167 (112)               | 0.57    |
| Fruits, g                                                                        | 2.6       | 232 (184)              | 212 (170)               | 0.02    |
| Soft drinks, g                                                                   | 2.6       | 75 (167)               | 99 (195)                | 0.002   |
| Processed meat, g                                                                | 2.6       | 34.9 (27.7)            | 35.3 (26.3)             | <0.001  |
| Selected circulating fatty acids (FA) , % total fatty acids                      |           |                        |                         |         |
| Saturated FA (16:0+18:0)                                                         | 0         | 46.1 (1.2)             | 46.3 (1.2)              | <0.001  |
| Monounsaturated FA (16:1+18:1)                                                   | 0         | 11.1 (1.9)             | 11.2 (1.8)              | <0.001  |
| Trans FA (trans 18:1+18:2)                                                       | 0         | 0.29 (0.17)            | 0.36 (0.19)             | <0.001  |
| n-3 polyunsaturated FA                                                           | 0         | 6.4 (1.9)              | 6.7 (2.0)               | <0.001  |
| n-6 polyunsaturated FA                                                           | 0         | 31.6 (3.0)             | 31.0 (2.9)              | 0.05    |
| Body mass index, kg/m <sup>2</sup>                                               | 0.7       | 27.6 (4.8)             | 27.7 (5.1)              | <0.001  |
| Triglycerides, mmol/L                                                            | 4.6       | 1.60 (1.18)            | 1.69 (1.18)             | 0.26    |
| High-density lipoprotein, mmol/L                                                 | 4.6       | 1.40 (0.42)            | 1.37 (0.42)             | 0.84    |
| C-reactive protein, μmol/L                                                       | 4.6       | 2.9 (4.9)              | 3.1 (5.1)               | 0.72    |
| Fatty acid pattern score (scaled to mean=0, sd=1 of randomly-sampled population) | 0         | -0.23                  | -0.23                   | 0.79    |
| Follow-up period                                                                 | 0         | 9.8 (3.7)              | 9.7 (3.9)               |         |
| Incident diabetes cases, % (rate) among randomly-sampled participants            | 0         | 4.6<br>(384/100,000)   | 5.7<br>(476/100,000)    | <0.001  |

\* EPIC-InterAct, European Prospective Investigation into Cancer and Nutrition-InterAct. Participants missing one or more of the listed variables in the first column. P-values were obtained by multivariable logistic regression examining missing for 1 or more variable as a binary outcome (yes/no) and all the variables listed in the left column as predictors, except different subtypes of fatty acids. The fatty acid subtypes were examined simultaneously in a model not including the fatty acid pattern variable.

† Family history of diabetes was not assessed in centres in Italy and Spain or in 1 UK centre (Oxford) or 1 German centre (Heidelberg). In the other 6 countries, 24.5% of participants had the missing information. This variable was neither accounted in the subgroup with missing information nor as a confounder (tested as yes, no, or unknown) in main analyses.

‡ Coded as yes, if a prior history was self-reported.
