# Supplementary material for: A combination of plasma phospholipid fatty acids and its association with incidence of type 2 diabetes: The EPIC-InterAct case-cohort study
Source: PubMed Central journal article supplement (PMC5636062; doi:10.1371/journal.pmed.1002409), 2017-10-11
Supplement: pmed.1002409.s009.pdf [file pmed.1002409.s009.pdf]

**S4 Table.** Internal cross-validation for derivation of the fatty acid pattern score and its prospective association with incident type 2 diabetes in EPIC-InterAct: sensitivity analysis to examine internal validity.\*

| Derivation set to derive a fatty acid pattern score |        | Validation set in which longitudinal analysis was performed, using the fatty acid pattern score calculated based on a pattern structure derived from the Derivation set. |        |                          |                                                  |                                                             |
|-----------------------------------------------------|--------|--------------------------------------------------------------------------------------------------------------------------------------------------------------------------|--------|--------------------------|--------------------------------------------------|-------------------------------------------------------------|
| Population from the sub-cohort                      | n      | Population                                                                                                                                                               | n      | Correlation coefficient† | HR (95% CI) ‡ adjusted for potential confounders | HR (95% CI)‡ additionally adjusted for adiposity and lipids |
| All adults                                          | 15,919 | All                                                                                                                                                                      | 27,296 | 1.0                      | 0.28 (0.24-0.32)                                 | 0.38 (0.30-0.47)                                            |
| Country                                             |        |                                                                                                                                                                          |        |                          |                                                  |                                                             |
| France excluded                                     | 15,332 | France                                                                                                                                                                   | 866    | >0.99                    | 0.18 (0.13-0.24)                                 | 0.23 (0.16-0.33)                                            |
| Italy excluded                                      | 13,913 | Italy                                                                                                                                                                    | 3,369  | >0.99                    | 0.38 (0.34-0.44)                                 | 0.50 (0.43-0.58)                                            |
| Spain excluded                                      | 12,364 | Spain                                                                                                                                                                    | 5,837  | >0.99                    | 0.41 (0.37-0.45)                                 | 0.59 (0.52-0.66)                                            |
| United Kingdom excluded                             | 14,609 | United Kingdom                                                                                                                                                           | 2,296  | >0.99                    | 0.25 (0.22-0.30)                                 | 0.28 (0.24-0.34)                                            |
| Netherlands excluded                                | 14,419 | Netherlands                                                                                                                                                              | 2,283  | >0.99                    | 0.26 (0.22-0.31)                                 | 0.34 (0.28-0.43)                                            |
| Germany excluded                                    | 13,874 | Germany                                                                                                                                                                  | 3,562  | >0.99                    | 0.36 (0.32-0.41)                                 | 0.54 (0.47-0.63)                                            |
| Sweden excluded                                     | 13,093 | Sweden                                                                                                                                                                   | 5,128  | >0.99                    | 0.32 (0.29-0.35)                                 | 0.43 (0.38-0.48)                                            |
| Denmark excluded                                    | 2,826  | Denmark                                                                                                                                                                  | 3,955  | >0.99                    | 0.32 (0.29-0.36)                                 | 0.43 (0.38-0.49)                                            |
|                                                     |        | Pooled §                                                                                                                                                                 | 27,296 | >0.99                    | 0.31 (0.27-0.36)                                 | 0.40 (0.34-0.50)                                            |
| Age                                                 |        |                                                                                                                                                                          |        |                          |                                                  |                                                             |
| ≥55 years                                           | 6,386  | <55 years                                                                                                                                                                | 14,742 | >0.99                    | 0.23 (0.18-0.28)                                 | 0.32 (0.23-0.42)                                            |
| <55 years                                           | 9,533  | ≥55 years                                                                                                                                                                | 12,554 | >0.99                    | 0.30 (0.26-0.35)                                 | 0.39 (0.31-0.48)                                            |
|                                                     |        | Pooled §                                                                                                                                                                 | 27,296 | >0.99                    | 0.34 (0.27-0.44)                                 | 0.42 (0.30-0.57)                                            |
| Sex                                                 |        |                                                                                                                                                                          |        |                          |                                                  |                                                             |
| Women                                               | 9,917  | Men                                                                                                                                                                      | 11,659 | 0.99                     | 0.31 (0.25-0.39)                                 | 0.39 (0.32-0.47)                                            |
| Men                                                 | 6,002  | Women                                                                                                                                                                    | 15,637 | 0.99                     | 0.26 (0.21-0.30)                                 | 0.37 (0.29-0.48)                                            |
|                                                     |        | Pooled §                                                                                                                                                                 | 27,296 | 0.99                     | 0.26 (0.20-0.35)                                 | 0.36 (0.30-0.44)                                            |
| Adiposity                                           |        |                                                                                                                                                                          |        |                          |                                                  |                                                             |
| BMI≥25.0 kg/m <sup>2</sup>                          | 2,512  | BMI<25.0 kg/m <sup>2</sup>                                                                                                                                               | 19,804 | >0.99                    | 0.39 (0.34-0.44)                                 | 0.48 (0.41-0.56)                                            |
| BMI<25.0 kg/m <sup>2</sup>                          | 13,307 | BMI≥25.0 kg/m <sup>2</sup>                                                                                                                                               | 7,295  | >0.99                    | 0.30 (0.25-0.36)                                 | 0.35 (0.27-0.45)                                            |
|                                                     |        | Pooled §                                                                                                                                                                 | 27,296 | >0.99                    | 0.28 (0.23-0.34)                                 | 0.38 (0.33-0.45)                                            |

\* EPIC-InterAct, European Prospective Investigation into Cancer and Nutrition-InterAct study (n=27,296). Principal component analysis (PCA) was performed, evaluating 27 individual fatty acids among adults in a specific population sub-group (derivation sets) of the randomly-sampled sub-cohort population. Using the scoring coefficients in the derived pattern, the fatty acid pattern score was calculated among all adults in the validation set, not included in each derivation set. Thus, adults in the derivation set and validation set were mutually independent (with exception of the top row). In the validation set, prospective associations of the fatty acid pattern score with incident type 2 diabetes were examined by Cox proportional hazard regression.

† Pearson correlation coefficient between the two fatty acid pattern scores: one derived from all sub-cohort participants (top row), used in the main analysis, and the other one from each Derivation set.

‡ All estimates were for 10th to 90th percentile range determined by eight countries. The first model (the second right column) adjusted for recruitment centres (2 to 6 categories in each country), age, sex, education history (none, primary school, secondary school, technical school, university or upper), smoking status (never, former, current), alcohol consumption levels (continuous), dietary factors (dietary fibre, fruits, vegetables, processed meats, soft drinks), physical activity levels (inactive, moderately inactive, and moderately active, active), menopause status (pre-, peri- or post-menopause, or surgical post-menopause; women only), hormone replacement use (yes/no; women only), and prevalent diseases (yes, no for each myocardial infarction or angina, hypertension, and hyperlipidaemia). Sex was dropped, when used for stratification. The second model (the first right column) further adjusted for body-mass index, triglycerides and high-density lipoprotein cholesterol.

§ The HR (95% CI) derived in mutually independent strata were pooled by using random-effects meta-analysis.
