# Supplementary material for: A combination of plasma phospholipid fatty acids and its association with incidence of type 2 diabetes: The EPIC-InterAct case-cohort study
Source: PubMed Central journal article supplement (PMC5636062; doi:10.1371/journal.pmed.1002409), 2017-10-11
Supplement: pmed.1002409.s010.pdf [file pmed.1002409.s010.pdf]

**S5 Table.** Coefficients to calculate the fatty acid pattern score derived from the sub-cohort of EPIC-InterAct (n=15,919).\*

| Individual fatty acids             | Name                             | Scoring coefficients † |
|------------------------------------|----------------------------------|------------------------|
| Long-chain Saturated FA            |                                  |                        |
| 14:0                               | Myristic acid                    | -0.08608               |
| 16:0                               | Palmitic acid                    | -0.11792               |
| 18:0                               | Stearic acid                     | 0.08241                |
| Odd-chain saturated FA             |                                  |                        |
| 15:0                               | Pentadecanoic acid               | 0.05438                |
| 17:0                               | Heptadecanoic acid               | 0.12617                |
| Very long-chain saturated FA       |                                  |                        |
| 20:0                               | Arachidic acid                   | 0.11988                |
| 22:0                               | Behenic acid                     | 0.14970                |
| 23:0                               | Tricosanoic acid                 | 0.10356                |
| 24:0                               | Lignoceric acid                  | 0.12923                |
| Monounsaturated FA                 |                                  |                        |
| 16:1                               | Palmitoleic acid                 | -0.17382               |
| 18:1 n-9                           | Oleic acid                       | -0.11268               |
| Very long-chain monounsaturated FA |                                  |                        |
| 20:1                               | Gondoic acid                     | -0.02372               |
| 24:1                               | Nervonic acid                    | 0.10325                |
| Omega-6 PUFA                       |                                  |                        |
| 18:2 n-6                           | Linoleic acid                    | 0.11022                |
| 18:3 n-6                           | $\gamma$ -linolenic acid         | -0.11696               |
| 20:3 n-6                           | Dihomo- $\gamma$ -linolenic acid | -0.09440               |
| 20:4 n-6                           | Arachidonic acid                 | -0.04052               |
| Omega-3 PUFA                       |                                  |                        |
| 18:3 n-3                           | $\alpha$ -linolenic acid         | -0.00800               |
| 20:5 n-3                           | Eicosapentaenoic acid            | 0.00527                |
| 22:5 n-3                           | Docosapentaenoic acid            | -0.00351               |
| 22:6 n-3                           | Docosahexaenoic acid             | 0.05004                |
| Trans unsaturated FA               |                                  |                        |
| Trans 18:1                         | Elaidic acid                     | 0.04266                |
| Trans 18:2                         | Trans linoleic acid              | 0.03424                |
| Others                             |                                  |                        |
| 17:1                               | Heptadecenoic acid               | -0.02832               |
| 20:2                               | Eicosadienoic acid               | -0.02678               |
| 22:4                               | Adrenic acid                     | -0.09844               |
| 22:5 n-6                           | Docosapentaenoic acid            | -0.09872               |

\* EPIC-InterAct, European Prospective Investigation into Cancer and Nutrition-InterAct (EPIC-InterAct), using the fatty acid pattern score generated by applying principal component analysis to 27 individual fatty acids of circulating plasma phospholipids.

† A score can be generated by 1) multiplying each coefficient with each fatty acid scaled to be mean=0 and standard deviation=1; and 2) summing up the products.
